# Supplementary material for: Histone methyltransferase G9a is a key regulator of the starvation-induced behaviors in Drosophila melanogaster
Source: PubMed Central journal article supplement (PMC5676964; doi:10.1038/s41598-017-15344-2), 2017-11-07
Supplement: 41598_2017_15344_MOESM1_ESM.pdf [file 41598_2017_15344_MOESM1_ESM.pdf]

Supplementary information

**Histone methyltransferase G9a is a key regulator of the starvation-induced behaviors in *Drosophila melanogaster***

**Kouhei Shimaji<sup>1,2</sup>, Ryo Tanaka<sup>1,2</sup>, Toru Maeda<sup>3</sup>, Mamiko Ozaki<sup>3</sup>, Hideki Yoshida<sup>1,2</sup>, Yasuyuki Ohkawa<sup>4</sup>, Tetsuya Sato<sup>5</sup>, Mikita Suyama<sup>5</sup> and Masamitsu Yamaguchi<sup>1,2\*</sup>**

<sup>1</sup>Department of Applied Biology, <sup>2</sup>The Center for Advanced Insect Research Promotion, Kyoto Institute of Technology, Matsugasaki, Sakyo-ku, Kyoto, 606-8585, Japan

<sup>3</sup>Department of Biology, Graduate School of Science, Kobe University, Nada, Kobe, 657-8501, Japan

<sup>4</sup>Department of Advanced Medical Initiatives, Faculty of Medicine, <sup>5</sup>Division of Bioinformatics, Medical Institute of Bioregulation, Kyushu University, Maidashi, Fukuoka, 812-8582, Japan

\*Correspondence: Phone, +81 75 724 7781; Fax, +81 75 724 7799; E-mail, [myamaguc@kit.ac.jp](mailto:myamaguc@kit.ac.jp)

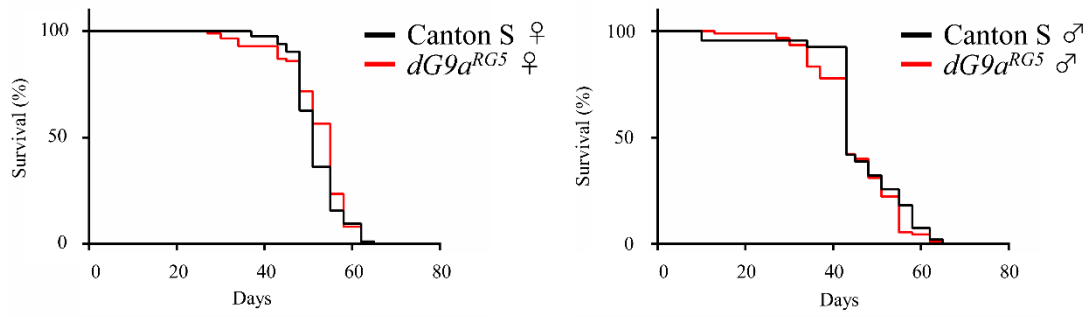

**Figure S1** The results of life span assays using males and females of the wild-type (Canton S) (♀; n=83 from 5 independent experiments, ♂; n=93 from 5 independent experiments) and *dG9a* null mutant (*dG9a<sup>RG5</sup>*) (♀; n=85 from 5 independent experiments, ♂; n=90 from 5 independent experiments). ♀;  $P = 0.18$ . ♂;  $P = 0.09$ .

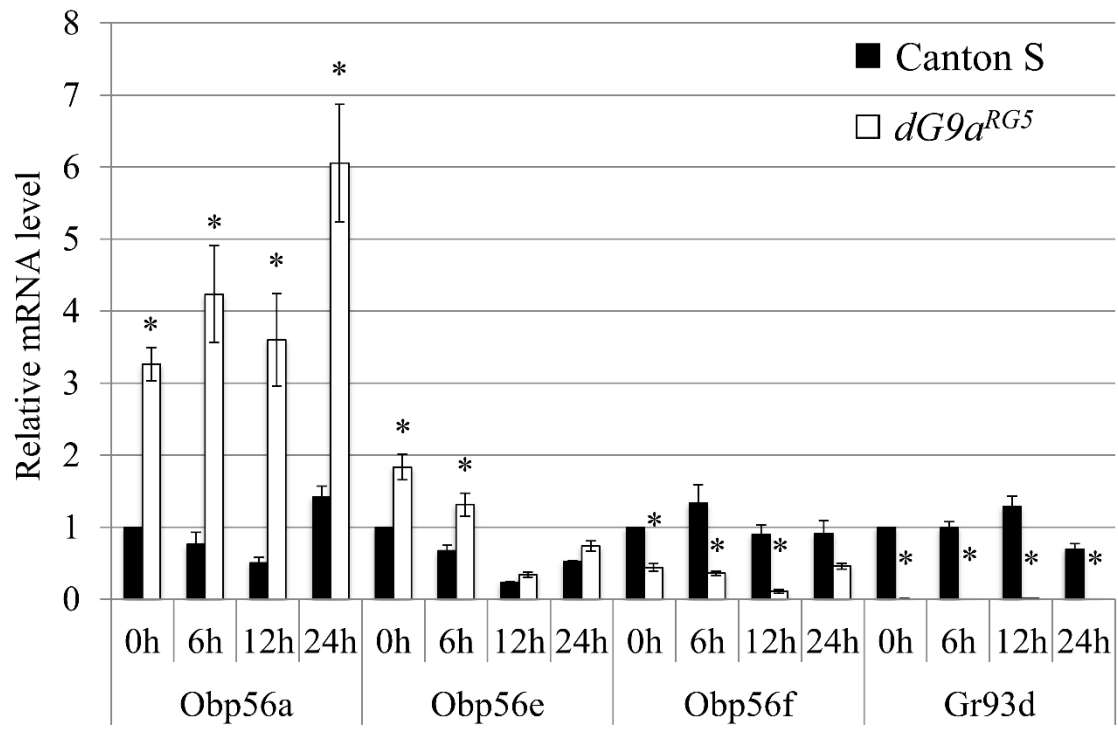

**Figure S2** Quantification of mRNA levels by RT-qPCR analyses of *Obp56a*, *Obp56e*, *Obp56f* and *Gr93d* in Canton S and *dG9a<sup>RG5</sup>* adult flies after 0 h, 6 h, 12 h and 24 h starvation. Error bars represent SE. n=3. \*  $P < 0.05$ .

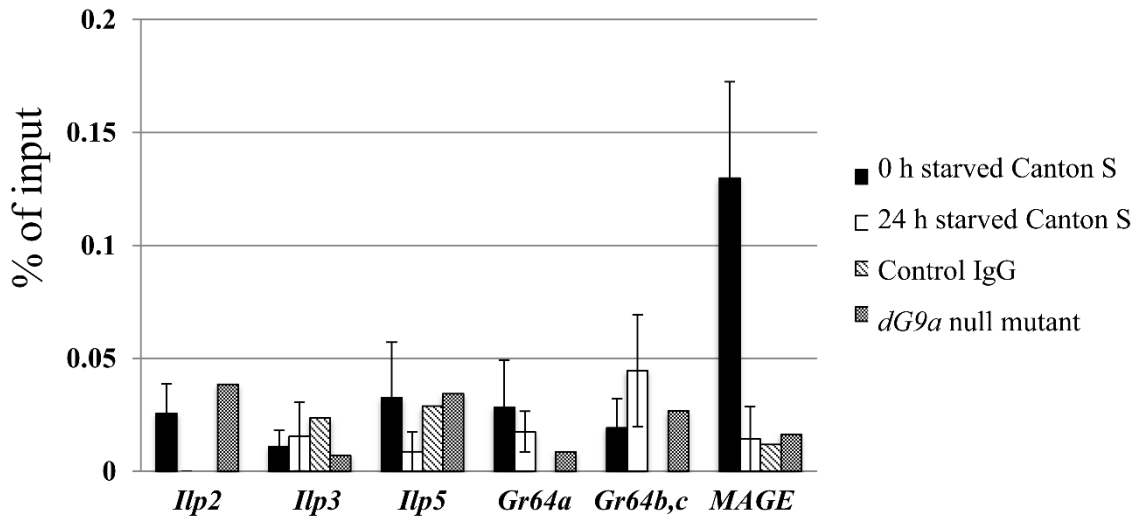

**Figure S3** dG9a does not bind to the promoter region of *Ilp* genes and *Gr64* genes. (B) The results of ChIP assays using the anti-dG9a antibody as well as control IgG in Canton S and *dG9a<sup>RG5</sup>*. Immunoprecipitated DNA was analyzed by RT-qPCR with primers for *Ilp2*, *Ilp3*, *Ilp5*, *Gr64a*, *Gr64b/c* and *Drosophila MAGE*. Results were normalized to inputs and shown as %. *MAGE* is a well-known direct target of G9a in mouse (Tachibana 2006) and *Drosophila* (Shimaji 2015). Canton S: n=3. Control IgG, *dG9a* null mutant: n=1.

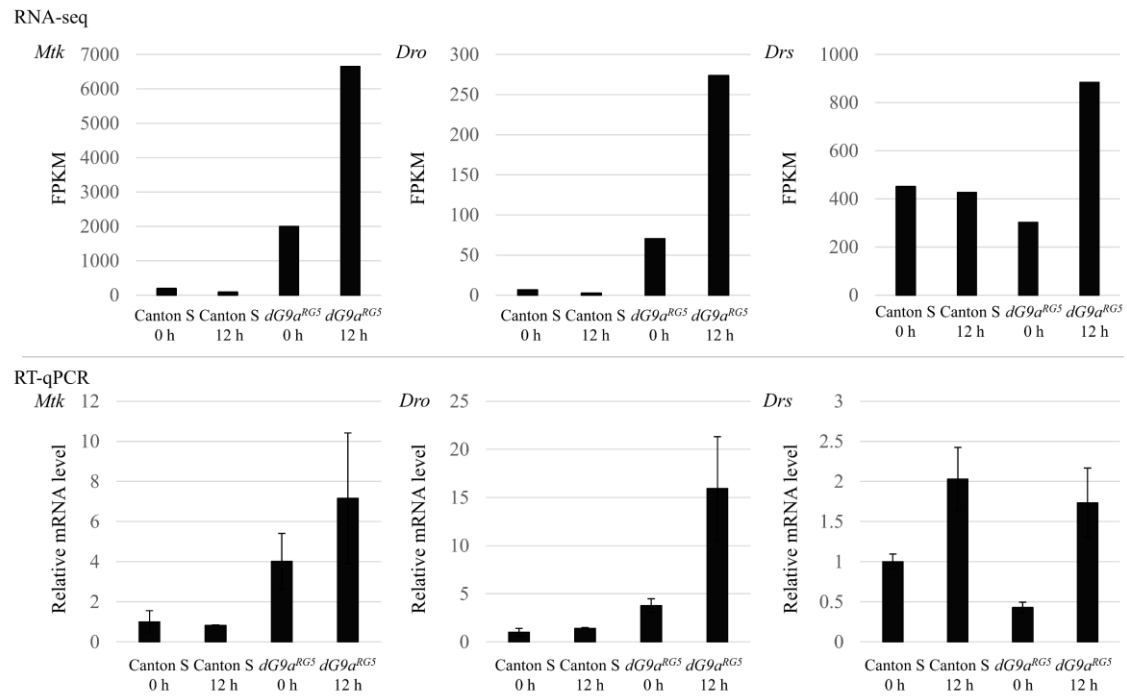

**Figure S4** Quantification of mRNA levels by RNA-seq analyses (upper) and RT-qPCR analyses (bottom) of *Mtk*, *Dro* and *Drs* in Canton S and *dG9a<sup>RG5</sup>* adult flies after 0 h and 12 h starvation. Error bars represent SE. RT-qPCR: n=3.
